# Supplementary material
Source: MDPI journal article supplement (https://www.mdpi.com/2073-4344/13/8/1212)
Supplement: s1 [file s1 › catalysts-2541184-supplementary.pdf]

# Supporting information

## Table of Content

|                                                                                                                                                                       |           |
|-----------------------------------------------------------------------------------------------------------------------------------------------------------------------|-----------|
| <b>Method of Microkinetic modelings</b>                                                                                                                               | <b>S1</b> |
| <b>Figure S1.</b> Optimized Cu-BEA models with diverse Cu active site motifs (a) $Z^a$ -Cu; (b) $Z^b$ -Cu; (c) $Z^c$ -Cu site.                                        | <b>S3</b> |
| <b>Scheme S1.</b> Schematic reaction for $N_2O$ -ODHP over $Z^a$ -Cu (reaction Route A), $Z^b$ -Cu (reaction Route B) and $Z^c$ -Cu (reaction Route C), respectively. | <b>S4</b> |
| <b>Table S1.</b> Micro-dynamics parameters of the reaction steps over $Z^a$ -Cu, $Z^b$ -Cu and $Z^c$ -Cu site.                                                        | <b>S5</b> |
| <b>Figure S2.</b> The comparison of net reaction rate over $Z^a$ -Cu, $Z^b$ -Cu and $Z^c$ -Cu site at 823K.                                                           | <b>S6</b> |
| <b>Materials and Methods</b>                                                                                                                                          | <b>S7</b> |
| <b>Reference</b>                                                                                                                                                      | <b>S8</b> |

## Method of Microkinetic modelings

Microkinetic modelings, as also reported in our previous work [1], are conducted to determine the main reaction pathways, rate-determining steps, and surface species coverage[2] [3-5]. The results of DFT frequency can be used to calculate the pre exponential factor of elementary reaction. The forward reaction pre index factor ( $V_{\text{forward}}$ ) and the reverse reaction pre index factor ( $V_{\text{reverse}}$ ) are calculated using Eq. (S1) and (S2) respectively:

$$V_{\text{for}} = \frac{\prod_{m=1}^N v_m^{\text{IS}}}{\prod_{n=1}^N v_n^{\text{TS}}} \quad (\text{S1})$$

$$V_{\text{rev}} = \frac{\prod_{m=1}^N v_m^{\text{FS}}}{\prod_{n=1}^N v_n^{\text{TS}}} \quad (\text{S2})$$

$v_m^{\text{IS}}$  is the frequency of the initial state of the reaction;  $v_n^{\text{TS}}$  is the frequency of the transition state (the saddle point in the reaction);  $v_m^{\text{FS}}$  is the frequency of the final state of the reaction.

The reaction rate constant of elementary reaction can be calculated according to Arrhenius formula through Eq. (S3) [6]:

$$k = A \exp\left(-\frac{E}{RT}\right) \quad (\text{S3})$$

wherein the  $k$  stands for reaction rate constant;  $A$  stands for pre-exponential factor;  $E$  stands for reaction energy barrier (calculated by DFT);  $R$  is the molar gas constant;  $T$  is for temperature.

In addition, the pre exponential factor of the desorption step is calculated using Eq. (S4) [7,8].

$$A = \frac{k_B T}{h} e^{n_1} \left( \frac{P^\theta}{RT} \right)^{1-n} \exp\left( \frac{\Delta_r S_m^\theta(P^\theta)}{R} \right) \quad (\text{S4})$$

$k_B$  is the Boltzmann constant;  $h$  is Planck's constant;  $P^\theta$  represents standard partial pressure;  $\Delta_r S_m^\theta$  is the standard molar entropy difference before and after desorption;  $n_1$  represents the sum of reaction coefficients of gaseous reactants;  $n$  is the sum of all the reactants.

The Reaction rate constant of the adsorption step is calculated by Eq. (S5) [9]:

$$k_{ad} = s_0 P_i A_i / \sqrt{2\pi m_i k_B T} \quad (S5)$$

Among them,  $k_{ad}$  represents the adsorption rate;  $s_0$  represents the viscosity coefficient of the adsorbed species  $i$ ;  $P_i$  (pa) represents the gas phase partial pressure of the adsorbed species  $i$ ;  $A_i$  ( $m^2$ ) represents the adsorption area;  $m_i$  (kg) represents the molecular weight of the adsorbed species  $i$ ;  $k_B$  represents the Boltzmann constant.

The reaction rate equation is solved by using Matlab. Reaction rate and surface species coverage.

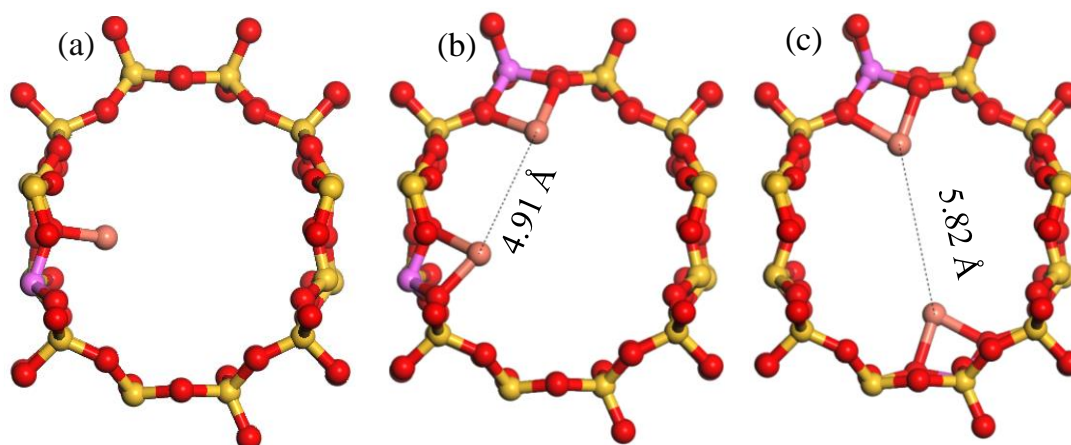

**Figure S1.** Optimized Cu-BEA models with diverse Cu active site motifs (a)  $Z^a$ -Cu; (b)  $Z^b$ -Cu; (c)  $Z^c$ -Cu site; Si (yellow), O (red), N (blue), Al (pink), Cu (orange).

|                 |                                                                                   |
|-----------------|-----------------------------------------------------------------------------------|
|                 | <b>monomeric [Cu]<sup>+</sup></b>                                                 |
| <b>Route A1</b> | $Z^a\text{-Cu-N}_2\text{O} \rightarrow \text{TSA1}$                               |
|                 | $\text{TSA1} \rightarrow Z^a\text{-Cu-O} + \text{N}_2$                            |
| <b>Route A2</b> | $Z^a\text{-Cu-O} + \text{C}_3\text{H}_8 \rightarrow \text{TSA2}$                  |
|                 | $\text{TSA2} \rightarrow Z^a\text{-Cu-OH-C}_3\text{H}_7$                          |
| <b>Route A3</b> | $Z^a\text{-Cu-OH-C}_3\text{H}_7 \rightarrow \text{TSA3}$                          |
|                 | $\text{TSA3} \rightarrow Z^a\text{-Cu-H}_2\text{O} + \text{C}_3\text{H}_6$        |
| <b>Part2</b>    | <b>dimeric [Cu-Cu]<sup>2+</sup></b>                                               |
| <b>Route B1</b> | $Z^b\text{-Cu}_2\text{-N}_2\text{O} \rightarrow \text{TSB1}$                      |
|                 | $\text{TSB1} \rightarrow Z^b\text{-Cu-O-Cu} + \text{N}_2(\text{g})$               |
| <b>Route B2</b> | $Z^b\text{-Cu-O-Cu} + \text{C}_3\text{H}_8 \rightarrow \text{TSB2}$               |
|                 | $\text{TSB2} \rightarrow Z^b\text{-Cu}_2\text{-C}_3\text{H}_7\text{-OH}$          |
| <b>Route B3</b> | $Z^b\text{-Cu}_2\text{-C}_3\text{H}_7\text{-OH} \rightarrow \text{TSB3}$          |
|                 | $\text{TSB3} \rightarrow Z^b\text{-Cu}_2\text{-C}_3\text{H}_6\text{-H}_2\text{O}$ |
| <b>Part3</b>    | <b>distant [Cu]<sup>+</sup>—[Cu]<sup>+</sup></b>                                  |
| <b>Route C1</b> | $Z^c\text{-Cu}_2\text{-N}_2\text{O} \rightarrow \text{TSC1}$                      |
|                 | $\text{TSC1} \rightarrow Z^c\text{-Cu}_2\text{-O} + \text{N}_2(\text{g})$         |
| <b>Route C2</b> | $Z^c\text{-Cu}_2\text{-O} + \text{C}_3\text{H}_8 \rightarrow \text{TSC2}$         |
|                 | $\text{TSC2} \rightarrow Z^c\text{-Cu}_2\text{-C}_3\text{H}_7\text{-OH}$          |
| <b>Route C3</b> | $Z^c\text{-Cu}_2\text{-C}_3\text{H}_7\text{-OH} \rightarrow \text{TSC3}$          |
|                 | $\text{TSC3} \rightarrow Z^c\text{-Cu}_2\text{-C}_3\text{H}_6\text{-H}_2\text{O}$ |

**Scheme S1.** Schematic reaction for N<sub>2</sub>O-ODHP over Z<sup>a</sup>-Cu (reaction Route A), Z<sup>b</sup>-Cu (reaction Route B) and Z<sup>c</sup>-Cu (reaction Route C), respectively.

**Table S1.** Micro-dynamics parameters of the reaction steps over  $Z^a$ -Cu,  $Z^b$ -Cu and  $Z^c$ -Cu site.

| Reaction step | Constant                                       | monomeric<br>[Cu] <sup>+</sup> | dimeric<br>[Cu-Cu] <sup>2+</sup> | distant<br>[Cu] <sup>+</sup> —[Cu] <sup>+</sup> |
|---------------|------------------------------------------------|--------------------------------|----------------------------------|-------------------------------------------------|
| <b>R1A</b>    | K <sub>1</sub>                                 | 2.30E-10                       | 4.94E-05                         | 5.74E-08                                        |
|               | k <sub>1</sub> , s <sup>-1</sup>               | 8.87E+10                       | 8.87E+10                         | 1.06E+11                                        |
|               | A <sub>1</sub> , s <sup>-1</sup>               | 1.00E-15                       | 7.40E+24                         | 1.00E-15                                        |
|               | k <sub>1</sub> <sup>-1</sup> , s <sup>-1</sup> | 3.85E+20                       | 1.80E+15                         | 1.85E+18                                        |
|               | A <sub>1</sub> <sup>-1</sup> , s <sup>-1</sup> | 3.95E+21                       | 2.99E+21                         | 3.23E+21                                        |
| <b>R2A</b>    | k <sub>2</sub> , s <sup>-1</sup>               | 1.73E+05                       | 5.61E+07                         | 1.34E+08                                        |
|               | A <sub>2</sub> , s <sup>-1</sup>               | 6.49E+13                       | 6.49E+13                         | 6.49E+13                                        |
|               | K <sub>3</sub>                                 | 5.63E-13                       | 1.28E-13                         | 2.20E-12                                        |
| <b>R3A</b>    | k <sub>3</sub> , s <sup>-1</sup>               | 8.87E+10                       | 8.87E+10                         | 1.06E+11                                        |
|               | A <sub>3</sub> , s <sup>-1</sup>               | 1.00E-15                       | 3.98E+22                         | 1.00E-15                                        |
|               | k <sub>3</sub> <sup>-1</sup> , s <sup>-1</sup> | 1.58E+23                       | 6.94E+23                         | 4.84E+22                                        |
|               | A <sub>3</sub> <sup>-1</sup> , s <sup>-1</sup> | 3.40E+23                       | 2.58E+23                         | 2.78E+23                                        |
|               | K <sub>4</sub>                                 | 1.46E+15                       | 3.87E+07                         | 3.03E+07                                        |
| <b>R4A</b>    | k <sub>4</sub> , s <sup>-1</sup>               | 6.73E+11                       | 1.94E+10                         | 1.38E+12                                        |
|               | A <sub>4</sub> , s <sup>-1</sup>               | 1.29E+12                       | 1.29E+12                         | 1.29E+12                                        |
|               | k <sub>4</sub> <sup>-1</sup> , s <sup>-1</sup> | 4.61E-04                       | 5.00E+02                         | 4.54E+04                                        |
|               | A <sub>4</sub> <sup>-1</sup> , s <sup>-1</sup> | 1.70E+13                       | 1.70E+13                         | 1.70E+13                                        |
|               | K <sub>5</sub>                                 | 4.93E+00                       | 5.96E-01                         | 1.39E+07                                        |
| <b>R5A</b>    | k <sub>5</sub> , s <sup>-1</sup>               | 7.27E-03                       | 5.28E+01                         | 7.22E+12                                        |
|               | A <sub>5</sub> , s <sup>-1</sup>               | 7.82E+14                       | 7.82E+14                         | 1.39E+07                                        |
|               | k <sub>5</sub> <sup>-1</sup> , s <sup>-1</sup> | 9.19E-03                       | 8.85E+01                         | 1.28E+00                                        |
|               | A <sub>5</sub> <sup>-1</sup> , s <sup>-1</sup> | 2.40E+12                       | 2.40E+12                         | 2.40E+12                                        |
|               |                                                |                                |                                  |                                                 |

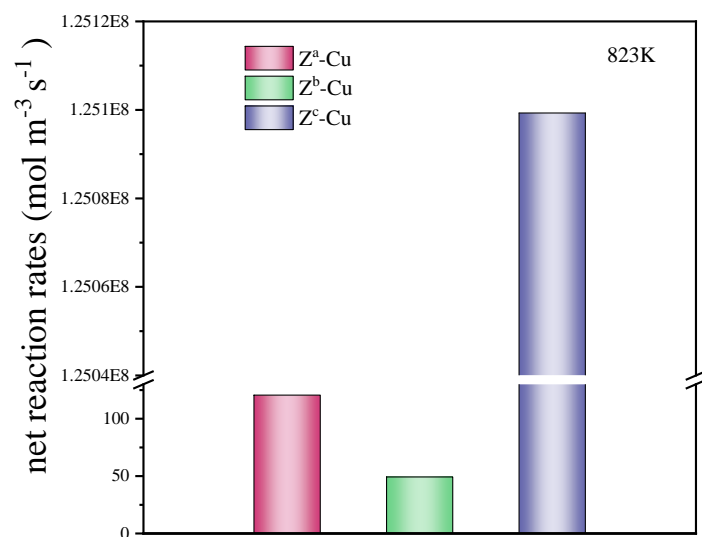

**Figure S2.** The comparison of net reaction rate over Schematic reaction for N<sub>2</sub>O-ODHP over Z<sup>a</sup>-Cu, Z<sup>b</sup>-Cu and Z<sup>c</sup>-Cu site at 823K.

## Materials and Methods

The parent H-zeolite catalyst (ZSM-5 and BEA) were commercial products provided by Nankai Catalyst Factory. The catalyst samples of 1%Cu-BEA, 1%Fe-BEA, 1%Fe-ZSM-5 and 1%CuO-SiO<sub>2</sub> with the metal loading of 1 wt.% was prepared via the impregnation method. The metallic nitrates of Fe (NO<sub>3</sub>)<sub>3</sub>·9H<sub>2</sub>O and Cu(NO<sub>3</sub>)<sub>2</sub>·3H<sub>2</sub>O as well as SiO<sub>2</sub> were purchased from Shanghai Aladdin Biochemical Technology Company.

Specifically, the impregnation procedure includes following steps: i) initially, 5 g H-zeolites or SiO<sub>2</sub> was mixed with desired amounts of metal nitrates in 300 mL round-bottom flask; ii) after adding 200 mL deionized water, the solution was stirring at 90 °C for 4h over the rotary vacuum evaporator; iii) the product can be eventually obtained after the further calcination at 550 °C for 6 h.

The catalyst activity measurement was conducted over a quartz fixed-bed reactor (id = 7 mm, od = 9 mm, L = 475 mm) at  $T = 550\text{ }^{\circ}\text{C}$ . The catalyst samples of 0.1 g (40~60 mesh) were loaded into the reactor, under the atmosphere of 10 vol% C<sub>3</sub>H<sub>8</sub>, 10 vol% N<sub>2</sub>O being balanced by He. The gas hourly space velocity (GHSV) was set to be 12,000 h<sup>-1</sup>, which corresponds to a flow rate of 21 mL min<sup>-1</sup>. Before the activity measurement, the samples were initially pretreated at 550 °C for 1h with He of 30 mL min<sup>-1</sup>. The outlet gases were on-line analyzed by gas chromatograph (Shimadzu GC-2014) which was equipped with TCD/FID detector, and Propark Q and 13X molecular sieve column.

## Reference

1. Xu, R.; Liu, N.; Dai, C.; Li, Y.; Zhang, J.; Wu, B.; Yu, G.; Chen, B., H<sub>2</sub>O - Built Proton Transfer Bridge Enhances Continuous Methane Oxidation to Methanol over Cu - BEA Zeolite. *Angew. Chem. Int. Ed.* **2021**, *60*, 16634-16640.
2. Zhou, Z.; Qin, B.; Li, S.; Sun, Y., A DFT-based microkinetic study on methanol synthesis from CO<sub>2</sub> hydrogenation over the In<sub>2</sub>O<sub>3</sub> catalyst. *Phys Chem Chem Phys* **2021**, *23*, 1888-1895.
3. Liu, N.; Yuan, X.; Zhang, R.; Xu, R.; Li, Y., Mechanistic insight into selective catalytic combustion of acrylonitrile (C<sub>2</sub>H<sub>3</sub>CN): NCO formation and its further transformation towards N<sub>2</sub>. *Phys. Chem. Chem. Phys.* **2017**, *19*, 7971-7979.
4. Liu, N.; Yuan, X.; Zhang, R.; Li, Y.; Chen, B., Mechanistic insight into selective catalytic combustion of HCN over Cu-BEA: influence of different active center structures. *Phys. Chem. Chem. Phys.* **2017**, *19*, 23960-23970.
5. Dixit, M.; Baruah, R.; Parikh, D.; Sharma, S.; Bhargav, A., Autothermal reforming of methane on rhodium catalysts: Microkinetic analysis for model reduction. *Comput. Chem. Eng.* **2016**, *89*, 149-157.
6. Ke, C.; Lin, Z., Density Functional Theory Based Micro- and Macro-Kinetic Studies of Ni-Catalyzed Methanol Steam Reforming. *Catalysts* **2020**, *10*.
7. Liu, N.; Zhang, R.; Chen, B.; Li, Y.; Li, Y., Comparative study on the direct decomposition of nitrous oxide over M (Fe, Co, Cu)-BEA zeolites. *J. Catal.* **2012**, *294*, 99-112.
8. Gokhale, A. A.; Kandoi, S.; Greeley, J. P.; Mavrikakis, M.; Dumesic, J. A., Molecular-level descriptions of surface chemistry in kinetic models using density functional theory. *Chem. Eng. Sci.* **2004**, *59*, 4679-4691.
9. Cai, Q.-X.; Wang, J.-G.; Wang, Y.-G.; Mei, D., Mechanistic insights into the structure-dependent selectivity of catalytic furfural conversion on platinum catalysts. *AIChE J.* **2015**, *61*, 3812-3824.
